# Supplementary material for: Effect of Nitrogen Doping on the Optical Bandgap and Electrical Conductivity of Nitrogen-Doped Reduced Graphene Oxide
Source: MDPI journal article supplement (doi:10.3390/molecules26216424), 2021-10-25
Supplement: s1 [file s1]

# Effect of Nitrogen Doping on the Optical Bandgap and Electrical Conductivity of Nitrogen-Doped Reduced Graphene Oxide

## SUPPLEMENTARY NOTES

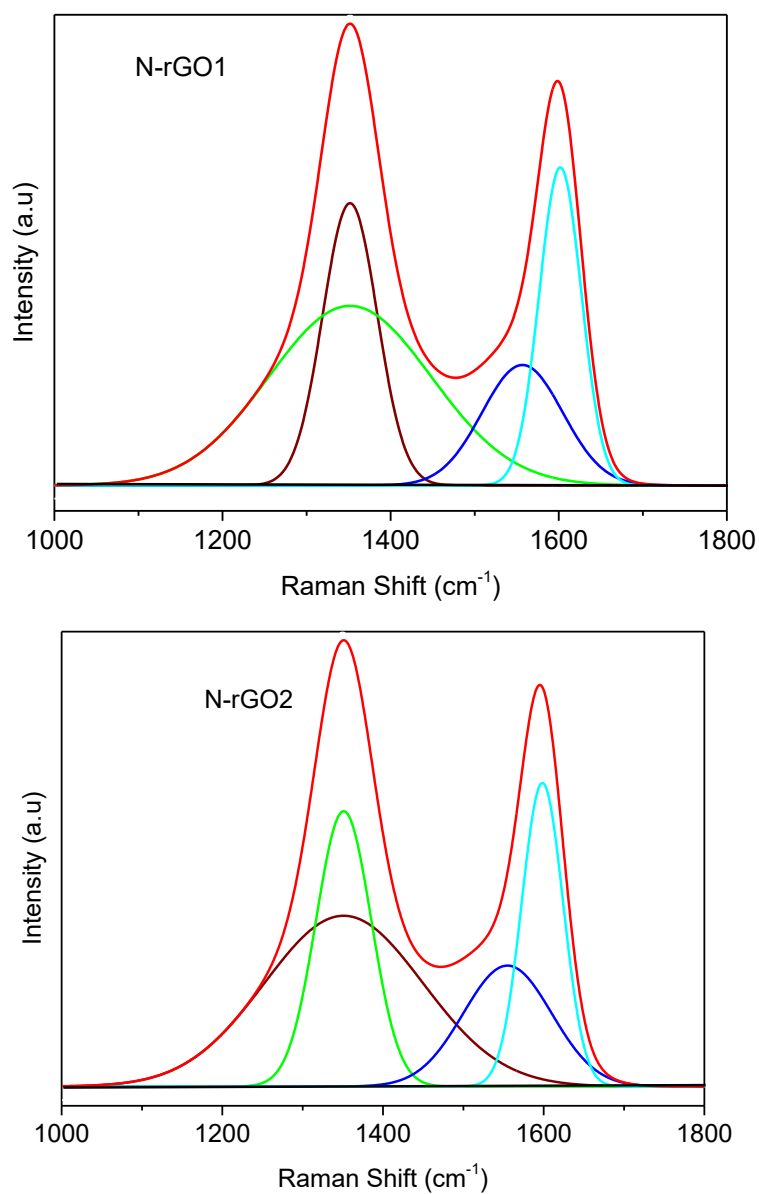

Figure S1: Raman deconvolution of N-rGO1 and N-rGO2 samples.

Table S1

| <b>Sample</b> | <b>I peak (%)</b> | <b>D'' peak (%)</b> |
|---------------|-------------------|---------------------|
| N-rGO1        | 52.5              | 12.25               |
| N-rGO2        | 46.2              | 11.51               |
| N-rGO3        | 43.7              | 10.35               |
